# Supplementary material
Source: HighWire-hosted journal article supplement (https://bmjopen.bmj.com/content/14/1/e077148)
Supplement: inline-supplementary-material-2 [file inline-supplementary-material-2.pdf]

### Extraction Sheet

- DOI
- Author
- Year of Publication
- Where the RCT was conducted
- Language
- Purpose of study
- Age of participants
- Type of data collection tool
- Online or offline data storage
- Custom or off the shelf
- Data protection/privacy
- Functionality
- Reliability
- Usability
- Efficiency
- Maintainability
- Portability
- Effectiveness
- Cost-benefit
- Satisfaction
- Freedom from risk
- Context coverage

| <b><u>Modified MST Framework</u></b> |                                 |                                                                                                                                                               |
|--------------------------------------|---------------------------------|---------------------------------------------------------------------------------------------------------------------------------------------------------------|
| Functionality                        | Suitability                     | Degree to which an MST meets stated and implied user needs when used under specified conditions                                                               |
|                                      | Accuracy                        | Degree to which an MST provides accurate results with the needed degree of precision                                                                          |
|                                      | Interoperability (Only Digital) | Degree to which MSTs can exchange information with other systems and use information that has been exchanged                                                  |
|                                      | Security                        | Degree to which an MST protects data from unauthorized access by other persons or systems                                                                     |
| Reliability                          | Maturity                        | Degree to which an MST has overcome initial bugs and defects, and meets needs for reliability under normal operation                                          |
|                                      | Fault Tolerance (Digital)       | Degree to which an MST operates as intended despite the presence of hardware or software faults                                                               |
|                                      | Recoverability                  | Degree to which, in the event of an interruption or a failure, an MST can recover the data directly affected and re-establish the desired state of the system |
| Usability                            | Understandability               | Degree to which the features and functions of an MST can be understood by users with a wide range of backgrounds and levels of expertise                      |
|                                      | Learnability                    | Degree to which users with a wide range of backgrounds and levels of expertise can efficiently learn to use an MST to achieve specified goals                 |
|                                      | Operability                     | Degree to which an MST is easy to operate and control                                                                                                         |

| <b><u>Modified MST Framework</u></b> |                      |                                                                                                                                                                                                                                                      |
|--------------------------------------|----------------------|------------------------------------------------------------------------------------------------------------------------------------------------------------------------------------------------------------------------------------------------------|
|                                      | Attractiveness       | Degree to which users perceive an MST's user interface to be attractive and satisfying to use                                                                                                                                                        |
| Efficiency                           | Time Behaviour       | Degree to which MST response times, processing times, and throughput rates meet or exceed user requirements                                                                                                                                          |
|                                      | Resource Utilisation | Degree to which the amounts and types of resources used by an MST, when performing its functions, meet requirements                                                                                                                                  |
| Maintainability                      | Analyzability        | Degree of effectiveness and efficiency with which it is possible to assess the impact on an MST of an intended change to one or more of its parts, or to diagnose an MST for deficiencies or causes of failures, or to identify parts to be modified |
|                                      | Changeability        | Degree to which an MST can be effectively and efficiently modified by users without introducing defects or degrading existing product quality                                                                                                        |
|                                      | Stability            | Degree to which an MST performs free from failures, interruptions, and unexpected effects                                                                                                                                                            |
|                                      | Testability          | Degree of effectiveness and efficiency with which test criteria can be established for an MST and tests can be performed to determine whether those criteria have been met                                                                           |
| Portability                          | Adaptability         | Degree to which an MST can effectively and efficiently be adapted for different or evolving hardware, software or other operational or usage environments                                                                                            |

| <b><u>Modified MST Framework</u></b> |                          |                                                                                                                                                                               |
|--------------------------------------|--------------------------|-------------------------------------------------------------------------------------------------------------------------------------------------------------------------------|
|                                      | Ease of Installation     | Degree of effectiveness and efficiency with which an MST can be successfully installed and/or uninstalled in a specified environment                                          |
|                                      | Co-Existence             | The capability of an MST to exist and operate on systems on which other software simultaneously exists and operates                                                           |
|                                      | Replacability            | The capability of an MST to be used in place of another specified MST for the same purpose in the same environment                                                            |
| Effectiveness                        | User accomplishment      | Accuracy and completeness with which users achieve specified goals                                                                                                            |
| Efficiency                           | Cost-Benefit             | Resources expended in relation to the accuracy and completeness with which users achieve goals                                                                                |
| Satisfaction                         | Usefulness               | Degree to which a user is satisfied with their perceived achievement of pragmatic goals, including the results of use and the consequences of use                             |
|                                      | Trust                    | Degree to which a user or other stakeholder has confidence that an MST will behave as intended                                                                                |
|                                      | Pleasure                 | Degree to which a user obtains pleasure from fulfilling their personal needs when using an MST                                                                                |
|                                      | Comfort                  | Degree to which the user is satisfied with his or her physical comfort when using an MST                                                                                      |
| Freedom from Risk                    | Economic Risk Mitigation | Degree to which an MST mitigates potential risks to financial status, efficient operation, commercial property, reputation or other resources in the intended contexts of use |

| <b><u>Modified MST Framework</u></b> |                                   |                                                                                                                                                                        |
|--------------------------------------|-----------------------------------|------------------------------------------------------------------------------------------------------------------------------------------------------------------------|
|                                      | Health and Safety Risk Mitigation | Degree to which an MST mitigates potential risks to people in the intended contexts of use                                                                             |
|                                      | Environmental Risk Mitigation     | Degree to which an MST mitigates potential risks to property or the environment in the intended contexts of use                                                        |
| Context Coverage                     | Context Completeness              | Degree to which an MST can be used with effectiveness, efficiency, freedom from risk and satisfaction in all the specified contexts of use                             |
|                                      | Flexibility                       | Degree to which an MST can be used with effectiveness, efficiency, freedom from risk and satisfaction in contexts beyond those initially specified in the requirements |
| DOI                                  |                                   |                                                                                                                                                                        |
| Author and Year of Publication       |                                   |                                                                                                                                                                        |
| Where the RCT was conducted          |                                   |                                                                                                                                                                        |
| Language                             |                                   |                                                                                                                                                                        |
| Purpose of the Study                 |                                   |                                                                                                                                                                        |
| Age of Participants                  |                                   |                                                                                                                                                                        |
| Type of Data Collection Tool         |                                   |                                                                                                                                                                        |
| Online or Offline Data Storage       |                                   |                                                                                                                                                                        |
| Custom or Off the Shelf              |                                   |                                                                                                                                                                        |
| Data Protection/Privacy              |                                   |                                                                                                                                                                        |
